# Supplementary material for: Different competing risks models for different questions may give similar results in arthroplasty registers in the presence of few events: Illustrated with 138,234 hip (124,560 patients) and 139,070 knee (125,213 patients) replacements from the Dutch Arthroplasty Register
Source: PubMed Central journal article supplement — Acta Orthop. 2018 Feb 1;89(2):145–51. doi: 10.1080/17453674.2018.1427314 (PMC5901510; doi:10.1080/17453674.2018.1427314), 2018-02-01
Supplement: IORT_A_1427314_SM1687.pdf [file IORT_A_1427314_SM1687.pdf]

## Supplementary data

Table 3. Coefficients and standard errors (in parentheses) for cause-specific Cox and Fine-Gray regression, for revision and death as the end-point, on total hip replacement data. The cause-specific hazard ratios and subdistribution hazard ratios can be derived from these coefficients by computing  $\exp(\text{coefficient})$ . A positive coefficient implies a hazard ratio larger than 1, while a negative coefficient implies a hazard ratio smaller than 1

|                                   | Revision           |              | Death              |              |
|-----------------------------------|--------------------|--------------|--------------------|--------------|
|                                   | Cause-specific Cox | Fine-Gray    | Cause-specific Cox | Fine-Gray    |
| Fixation (uncemented)             |                    |              |                    |              |
| Cemented                          | -0.54 (0.05)       | -0.54 (0.05) | 0.23 (0.03)        | 0.24 (0.03)  |
| Age (70 or younger)               |                    |              |                    |              |
| Older than 70 years               | -0.11 (0.04)       | -0.13 (0.04) | 1.09 (0.03)        | 1.09 (0.04)  |
| Gender (female)                   |                    |              |                    |              |
| Male                              | 0.11 (0.04)        | 0.10 (0.04)  | 0.43 (0.03)        | 0.43 (0.03)  |
| ASA (ASA 1)                       |                    |              |                    |              |
| ASA 2                             | 0.08 (0.04)        | 0.08 (0.04)  | 0.41 (0.04)        | 0.40 (0.04)  |
| ASA 3/4                           | 0.27 (0.06)        | 0.24 (0.06)  | 1.28 (0.04)        | 1.27 (0.04)  |
| Diagnosis (osteoarthritis)        |                    |              |                    |              |
| Osteonecrosis                     | 0.15 (0.10)        | 0.13 (0.10)  | 0.62 (0.06)        | 0.61 (0.06)  |
| Post-Perthes/dysplasia            | 0.02 (0.11)        | 0.02 (0.11)  | -0.04 (0.12)       | -0.03 (0.12) |
| Rheumatoid/inflammatory arthritis | 0.06 (0.10)        | 0.05 (0.17)  | 0.36 (0.11)        | 0.36 (0.11)  |
| Late posttraumatic                | 0.49 (0.10)        | 0.47 (0.10)  | 0.65 (0.07)        | 0.63 (0.07)  |

Table 4. Coefficients and standard errors for cause-specific Cox and Fine-Gray regression, for revision and death as the end-point, on total knee replacement data. The cause-specific hazard ratios and subdistribution hazard ratios can be derived from these coefficients by computing  $\exp(\text{coefficient})$ . A positive coefficient implies a hazard ratio larger than 1, while a negative coefficient implies a hazard ratio smaller than 1

|                                   | Revision           |              | Death              |              |
|-----------------------------------|--------------------|--------------|--------------------|--------------|
|                                   | Cause-specific Cox | Fine-Gray    | Cause-specific Cox | Fine-Gray    |
| Fixation (uncemented)             |                    |              |                    |              |
| Cemented                          | -0.05 (0.06)       | -0.06 (0.06) | -0.02 (0.05)       | -0.03 (0.05) |
| Age (70 or younger)               |                    |              |                    |              |
| Older than 70 years               | -0.55 (0.03)       | -0.57 (0.03) | 1.31 (0.03)        | 1.32 (0.03)  |
| Gender (female)                   |                    |              |                    |              |
| Male                              | -0.01 (0.03)       | -0.02 (0.03) | 0.41 (0.03)        | 0.41 (0.03)  |
| ASA (ASA 1)                       |                    |              |                    |              |
| ASA 2                             | 0.00 (0.04)        | -0.01 (0.04) | 0.28 (0.04)        | 0.27 (0.04)  |
| ASA 3/4                           | 0.04 (0.06)        | 0.01 (0.06)  | 1.03 (0.05)        | 1.02 (0.05)  |
| Diagnosis (osteoarthritis)        |                    |              |                    |              |
| Osteonecrosis                     | -0.07 (0.25)       | -0.08 (0.25) | 0.45 (0.15)        | 0.45 (0.16)  |
| Rheumatoid/inflammatory arthritis | -0.20 (0.13)       | -0.20 (0.13) | 0.20 (0.09)        | 0.21 (0.09)  |
| Posttraumatic arthritis           | 0.28 (0.11)        | 0.28 (0.11)  | 0.00 (0.12)        | 0.00 (0.12)  |
